# Supplementary material for: Traditional Chinese Medicine Interventions in the Rehabilitation of Cognitive and Motor Function in Patients With Stroke: An Overview and Evidence Map
Source: Frontiers journal article supplement (doi:10.3389/fneur.2022.885095), 2022-05-17
Supplement: Data_Sheet_1.PDF [file Data_Sheet_1.PDF]

**Supplementary Table 1.** Search strategy

|                                                  |                                                                                                                                                 |
|--------------------------------------------------|-------------------------------------------------------------------------------------------------------------------------------------------------|
| <b>PubMed</b>                                    |                                                                                                                                                 |
| 1                                                | stroke OR cerebrovascular accident OR hemiplegia OR hemiparesis OR hemiparetic                                                                  |
| 2                                                | rehabilitation                                                                                                                                  |
| 3                                                | cognitive impairment                                                                                                                            |
| 4                                                | motor OR movement OR motion OR mobility OR function                                                                                             |
| 5                                                | 1 AND (2 OR 3 OR 4)                                                                                                                             |
| 6                                                | TCM OR Traditional Chinese Medicine OR Acupuncture OR Electroacupuncture OR Chinese herbal medicine OR moxibustion OR taichi OR qigong OR tuina |
| 7                                                | meta-analysis AND systematic review                                                                                                             |
| 8                                                | 5 AND 6 AND 7                                                                                                                                   |
| <b>CNKI</b>                                      |                                                                                                                                                 |
| 1                                                | 脑卒中 OR 中风                                                                                                                                       |
| 2.                                               | 康复 OR 后 OR 认知障碍 OR 运动功能障碍                                                                                                                       |
| 3.                                               | 1 AND 2                                                                                                                                         |
| 4.                                               | 中医 OR 中药 OR 针灸 OR 电针 OR 中草药 OR 艾灸 OR 太极 OR 气功 OR 推拿                                                                                             |
| 5.                                               | 系统评价 OR Meta分析 OR 荟萃分析                                                                                                                          |
| 6.                                               | 1 AND 4 AND 5                                                                                                                                   |
| <b>Korea Med</b>                                 |                                                                                                                                                 |
| (중풍 AND (재활 OR 인지 OR 운동)) AND (체계적 문헌고찰 OR 메타분석) |                                                                                                                                                 |

**Supplementary Table 2.** Definitions of different TCM intervention therapies.

| Type of TCM intervention       | Abbreviation | Definitions                                                                                                                                                                                                                                                                                                                                                                                                                                                                                                                                                                                                                                                                                               |
|--------------------------------|--------------|-----------------------------------------------------------------------------------------------------------------------------------------------------------------------------------------------------------------------------------------------------------------------------------------------------------------------------------------------------------------------------------------------------------------------------------------------------------------------------------------------------------------------------------------------------------------------------------------------------------------------------------------------------------------------------------------------------------|
| Acupuncture                    | AT           | Needle insertion into acupuncture points. Needling promotes Qi in the meridians.                                                                                                                                                                                                                                                                                                                                                                                                                                                                                                                                                                                                                          |
| Electroacupuncture             | EA           | Traditional acupuncture connected with electric stimulation apparatus, which is conducted by inserting acupuncture needles into the acupoints and then changing electric stimulation parameters, including the stimulation frequency, current intensity, pulse width, and pulse interval.                                                                                                                                                                                                                                                                                                                                                                                                                 |
| Eyes acupuncture               | EAT          | An involves fine-needle acupuncture, and may also include embedding catgut at acupoints and acupressure applied around the orbit of the eye.                                                                                                                                                                                                                                                                                                                                                                                                                                                                                                                                                              |
| Floating acupuncture           | FAT          | Also called Fu's Subcutaneous Needle (FSN), is an innovation for the treatment of myofascial pain and trigger points based on the research. Originating from Traditional Chinese Medicine, FSN does not follow the rules and principles of TCM and the chosen insertion points do not coincide with traditional acupuncture points. The similarities are limited to the distal insertion of the needle to the affected area, the needle itself being a non-injection needle, and the fact that both needles are manipulated and act on soft connective tissue. FSN abstains from the muscle and deep fascia layers and is confined to only the subcutaneous layer where collagen fiber are most abundant. |
| Fire-needle acupuncture        | FNA          | An acupuncture technique that involves quickly inserting a red hot needle into acupuncture points on the body. Fire needling combines conventional acupuncture and cauterization with heated needles.                                                                                                                                                                                                                                                                                                                                                                                                                                                                                                     |
| Jin's three-needle acupuncture | JTA          | JTN is a kind of acupuncture therapy characterized by its special way of choosing treatment points. An acupuncture prescription is made up of one or more acupoint groups. Each group consists of acupoints that are influential points, empirical points, or local points. There are 39 formulae (combinations) of acupoints, which are practical and finely selected.                                                                                                                                                                                                                                                                                                                                   |
| Scalp acupuncture              | SAT          | It is a contemporary acupuncture technique integrating traditional Chinese needling methods with Western medical knowledge of representative areas of the cerebral cortex. It has been proven to be a most effective technique for treating acute and chronic central nervous system disorders. Scalp acupuncture often produces remarkable results with just a few needles and usually brings about immediate improvement, sometimes taking only several seconds to a minute.                                                                                                                                                                                                                            |
| Warm-needle acupuncture        | WNA          | A method combining acupuncture with moxibustion, a moxa column is added to the end of the needle, ignites it, and the heat is transmitted through the needle to the body after being ignited to treat diseases.                                                                                                                                                                                                                                                                                                                                                                                                                                                                                           |
| Acupoint catgut embedding      | ACE          | An involves weekly infixing of surgical chromic catgut sutures into the subcutaneous tissue of acupoints located at the abdomen, extremities, and the back with a specialized needle under aseptic precautions.                                                                                                                                                                                                                                                                                                                                                                                                                                                                                           |
| Bee venom acupuncture          | BVA          | It is a kind of herbal acupuncture taking advantage of diluted bee venom instead of distilled herbal decoction.                                                                                                                                                                                                                                                                                                                                                                                                                                                                                                                                                                                           |
| Needle knife acupuncture       | NKA          | It is a closed minimally invasive surgery, which integrates the acupuncture in modern Chinese medicine with the knife in surgery. It can restore the biomechanical balance, release the soft tissue, improve the internal microcirculation, reduce the internal pressure of bone, alleviate the inflammatory reaction, and regulate the meridians.                                                                                                                                                                                                                                                                                                                                                        |
| Moxibustion                    | Moxa         | A method in which a moxa herb is burned above the skin or on the acupuncture points. It can be used as a cone stick, loose herb, or applied at the end of the acupuncture needles. The purpose of moxibustion is to apply heat to the acupuncture points to alleviate symptoms.                                                                                                                                                                                                                                                                                                                                                                                                                           |
| Chinese Herbal medicine        | CHM          | It is part of a larger healing system called traditional Chinese medicine (TCM). Herbs are prescribed to restore energy balance to the opposing forces of energy - Yin and Yang - that run through invisible channels in the body.                                                                                                                                                                                                                                                                                                                                                                                                                                                                        |
| Herbal fumigation              | HF           | A branch of Chinese medicine external treatment, also called traditional Chinese medicine steaming therapy, traditional Chinese medicine steam bath therapy. A combination of chemical and physical therapy with hot medicine steam as the therapeutic factor.                                                                                                                                                                                                                                                                                                                                                                                                                                            |
| Herbal socking                 | HS           | Herbal soaking method is to boil a suitable Chinese medicine formula into Chinese medicine water and soak the feet. With the help of hot water, the effective Chinese medicine ingredients penetrate into the skin, are absorbed by the capillaries of the feet, and enter the human blood circulation system to achieve.                                                                                                                                                                                                                                                                                                                                                                                 |
| Taichi                         | TC           | A kind of traditional Chinese exercise that share the common Chinese medicine theory and place an emphasis on a combination of physical exercise with mental focus; interaction between physical postures and movements, meditative mind, musculoskeletal relaxation and breathing techniques in a harmonious manner.                                                                                                                                                                                                                                                                                                                                                                                     |
| Baduanjin                      | BDJ          | A kind of traditional Chinese qigong that has been low-intensity aerobic exercised for a long time in China as a mind-body exercise.                                                                                                                                                                                                                                                                                                                                                                                                                                                                                                                                                                      |
| Daoyin                         | DY           | A kind of traditional Korean medicine exercise, it is divided into an exercise method in which the patient performs active exercise together with breathing and an exercise method in which the operator passively treats the patient.                                                                                                                                                                                                                                                                                                                                                                                                                                                                    |
| Tuina                          | TN           | Tuina is a kind of external therapy belonging to traditional Chinese medicine. Tuina massage stimulates the flow of qi to promote balance and harmony within the body using many of the same principles of acupuncture.                                                                                                                                                                                                                                                                                                                                                                                                                                                                                   |

TCM: Traditional Chinese medicine

**Supplementary Table 3.** Assessment of all included systematic reviews using AMSTAR 2.

| Study ID         | 1   | 2   | 3   | 4   | 5   | 6   | 7   | 8   | 9   | 10  | 11  | 12  | 13  | 14  | 15  | 16  | Rating overall confidence* |
|------------------|-----|-----|-----|-----|-----|-----|-----|-----|-----|-----|-----|-----|-----|-----|-----|-----|----------------------------|
| Zhou (2020)(12)  | Yes | No  | Yes | Yes | Yes | Yes | No  | Yes | Yes | Yes | Yes | Yes | Yes | Yes | No  | Yes | Moderate                   |
| Zhan (2017)(13)  | Yes | No  | Yes | Yes | Yes | Yes | No  | Yes | Yes | Yes | No  | Yes | Yes | No  | Yes | No  | Low                        |
| Xiong (2016)(14) | Yes | No  | No  | Yes | No  | Yes | No  | Yes | Yes | Yes | Yes | No  | Yes | No  | No  | No  | Critically low             |
| Shen (2020)(15)  | Yes | No  | Yes | Yes | Yes | No  | No  | Yes | Yes | Yes | Yes | No  | Yes | No  | No  | No  | Low                        |
| Lin (2015)(16)   | Yes | No  | No  | Yes | Yes | Yes | No  | Yes | Yes | Yes | Yes | No  | Yes | No  | No  | No  | Critically low             |
| Wei (2019)(17)   | Yes | No  | Yes | Yes | Yes | Yes | No  | Yes | Yes | Yes | Yes | Yes | Yes | Yes | Yes | No  | Low                        |
| Lim (2015)(18)   | Yes | No  | No  | Yes | No  | Yes | No  | Yes | Yes | Yes | Yes | No  | Yes | No  | No  | No  | Critically low             |
| Oh (2020)(19)    | Yes | No  | Yes | Yes | Yes | Yes | Yes | Yes | Yes | No  | Yes | Yes | Yes | No  | No  | No  | Low                        |
| Liu (2019)(20)   | Yes | No  | Yes | Yes | Yes | Yes | No  | Yes | Yes | Yes | Yes | Yes | Yes | No  | No  | Yes | Low                        |
| Wang (2019)(21)  | Yes | No  | Yes | Yes | Yes | Yes | No  | Yes | Yes | No  | Yes | Yes | Yes | Yes | No  | No  | Low                        |
| Li (2016)(22)    | Yes | No  | Yes | Yes | Yes | Yes | No  | Yes | Yes | No  | No  | Yes | Yes | No  | No  | No  | Critically low             |
| An (2017)(23)    | Yes | No  | Yes | Yes | Yes | No  | No  | Yes | Yes | No  | Yes | Yes | Yes | No  | No  | No  | Critically low             |
| Wu (2018)(24)    | Yes | No  | Yes | Yes | Yes | Yes | No  | Yes | Yes | Yes | Yes | Yes | Yes | Yes | Yes | No  | Low                        |
| Hou (2021)(25)   | Yes | No  | Yes | Yes | Yes | Yes | No  | Yes | Yes | No  | Yes | Yes | Yes | Yes | No  | No  | Low                        |
| Lin (2017)(26)   | Yes | No  | Yes | Yes | Yes | Yes | No  | Yes | Yes | No  | No  | Yes | Yes | No  | No  | No  | Critically low             |
| Zheng (2020)(27) | Yes | No  | Yes | Yes | No  | Yes | No  | Yes | Yes | No  | Yes | Yes | Yes | Yes | Yes | No  | Low                        |
| Wang (2020)(28)  | Yes | No  | Yes | Yes | Yes | Yes | No  | Yes | Yes | No  | Yes | Yes | Yes | Yes | No  | No  | Low                        |
| Guo (2015)(29)   | Yes | No  | Yes | Yes | No  | No  | No  | Yes | Yes | Yes | No  | Yes | Yes | No  | Yes | No  | Critically low             |
| Qi (2018)(30)    | Yes | No  | Yes | Yes | Yes | Yes | No  | Yes | Yes | No  | Yes | Yes | Yes | Yes | No  | No  | Low                        |
| Zhang (2016)(31) | Yes | No  | Yes | Yes | Yes | No  | No  | Yes | Yes | No  | Yes | Yes | Yes | No  | Yes | No  | Low                        |
| Zhan (2016)(32)  | Yes | No  | Yes | Yes | Yes | No  | No  | Yes | Yes | Yes | Yes | Yes | Yes | No  | Yes | No  | Critically low             |
| Lyu (2018)(33)   | Yes | No  | Yes | Yes | Yes | No  | No  | Yes | Yes | No  | Yes | Yes | Yes | No  | Yes | No  | Low                        |
| Zou (2018)(34)   | Yes | No  | Yes | Yes | Yes | Yes | No  | Yes | Yes | Yes | Yes | Yes | Yes | Yes | No  | Yes | Moderate                   |
| Zheng (2016)(35) | Yes | No  | Yes | Yes | Yes | Yes | No  | Yes | Yes | Yes | No  | No  | Yes | Yes | No  | No  | Low                        |
| Zhan (2018)(36)  | Yes | Yes | Yes | Yes | Yes | Yes | No  | Yes | Yes | Yes | Yes | Yes | Yes | Yes | Yes | Yes | Moderate                   |
| Ye (2017)(37)    | Yes | No  | Yes | No  | Yes | No  | No  | Yes | Yes | No  | No  | Yes | Yes | No  | No  | No  | Critically low             |
| Qiu (2021)(38)   | Yes | No  | Yes | No  | Yes | No  | No  | Yes | Yes | No  | No  | Yes | Yes | No  | No  | Yes | Moderate                   |
| Yang (2018)(39)  | Yes | No  | Yes | No  | Yes | No  | No  | Yes | Yes | No  | No  | Yes | Yes | No  | No  | No  | Critically low             |
| Cai (2019)(40)   | Yes | No  | Yes | Yes | Yes | Yes | No  | Yes | Yes | Yes | No  | No  | Yes | Yes | No  | Yes | Low                        |
| Yan (2015)(41)   | Yes | No  | Yes | No  | Yes | No  | No  | Yes | Yes | No  | No  | Yes | Yes | No  | No  | No  | Critically low             |
| Fan (2020)(42)   | Yes | No  | Yes | Yes | Yes | No  | No  | Yes | Yes | Yes | Yes | Yes | Yes | Yes | Yes | Yes | Moderate                   |
| Li (2021)(43)    | Yes | No  | Yes | Yes | Yes | Yes | No  | Yes | Yes | No  | Yes | Yes | Yes | Yes | No  | No  | Low                        |
| You (2020)(44)   | Yes | No  | Yes | Yes | Yes | Yes | No  | Yes | Yes | Yes | No  | Yes | Yes | Yes | No  | No  | Low                        |
| Xie (2020)(45)   | Yes | No  | Yes | Yes | Yes | Yes | No  | Yes | Yes | Yes | Yes | Yes | Yes | No  | No  | No  | Low                        |
| Yu (2019)(46)    | Yes | No  | Yes | No  | Yes | No  | No  | Yes | Yes | No  | Yes | Yes | Yes | No  | No  | No  | Critically low             |
| Wen (2020)(47)   | Yes | No  | Yes | Yes | Yes | No  | No  | Yes | Yes | No  | Yes | Yes | Yes | Yes | No  | No  | Low                        |
| Chen (2016)(48)  | Yes | No  | Yes | No  | Yes | No  | No  | Yes | Yes | No  | Yes | Yes | Yes | No  | No  | No  | Critically low             |
| Ma (2017)(49)    | Yes | No  | Yes | Yes | Yes | No  | No  | Yes | Yes | No  | No  | Yes | Yes | No  | No  | No  | Critically low             |
| Fan (2016)(50)   | Yes | No  | Yes | No  | Yes | No  | No  | Yes | Yes | No  | No  | Yes | Yes | No  | No  | No  | Critically low             |
| Chen (2020)(51)  | Yes | No  | Yes | Yes | Yes | Yes | No  | Yes | Yes | Yes | Yes | Yes | Yes | Yes | Yes | No  | Moderate                   |
| Liu (2017)(52)   | Yes | No  | Yes | No  | Yes | Yes | No  | Yes | Yes | Yes | Yes | No  | Yes | No  | Yes | No  | Critically low             |
| Zhang (2020)(53) | Yes | No  | Yes | Yes | Yes | Yes | No  | Yes | Yes | Yes | No  | Yes | Yes | Yes | Yes | No  | Low                        |
| Gou (2019)(54)   | Yes | No  | Yes | Yes | Yes | Yes | No  | Yes | Yes | Yes | No  | Yes | Yes | No  | Yes | No  | Low                        |
| Ji (2020)(55)    | Yes | No  | Yes | Yes | Yes | Yes | No  | Yes | Yes | Yes | Yes | Yes | Yes | Yes | Yes | No  | Moderate                   |
| Lee (2019)(56)   | Yes | No  | Yes | Yes | Yes | Yes | No  | Yes | Yes | Yes | Yes | Yes | Yes | Yes | No  | No  | Low                        |
| Wang (2018)(57)  | Yes | No  | Yes | Yes | Yes | Yes | No  | Yes | Yes | Yes | Yes | Yes | Yes | Yes | No  | No  | Low                        |
| Lin (2015)(58)   | Yes | No  | Yes | Yes | Yes | Yes | No  | Yes | Yes | Yes | Yes | Yes | Yes | Yes | Yes | Yes | Moderate                   |
| Bu (2017)(59)    | Yes | No  | Yes | No  | Yes | No  | No  | Yes | Yes | No  | No  | Yes | Yes | No  | No  | No  | Critically low             |

\*AMSTAR 2: A Measurement Tool to Assess systematic Reviews 2; AMSTAR2 was used to critically appraise the reporting quality of each included SR. The overall confidence of each SR was graded as “high” (no or non-critical weakness in all items), “moderate” (more than one non-critical weakness among all the items), “low” (one critical flaw with or without non-critical weakness), or “critically low” (more than one critical flaw with or without non-critical weakness).

1. Components of PICO; 2. Established prior to the conduct of the review; 3. Explain their selection of the study designs; 4. Comprehensive search; 5. Duplicate selection; 6. Duplicate extraction; 7. List of excluded studies and justify the exclusions; 8. Describe the included studies in adequate detail; 9. Use a satisfactory technique for assessing the risk of bias (RoB); 10. Report on the sources of funding; 11. Use appropriate methods for statistical combination of results; 12. Assess the potential impact of RoB in individual studies on the results; 13. Account for RoB in individual studies when interpreting/discussing the results of the review; 14. Provide a satisfactory explanation for, and discussion of, any heterogeneity observed in the results of the review; 15. Publication bias assessed; 16. Include conflict of interest

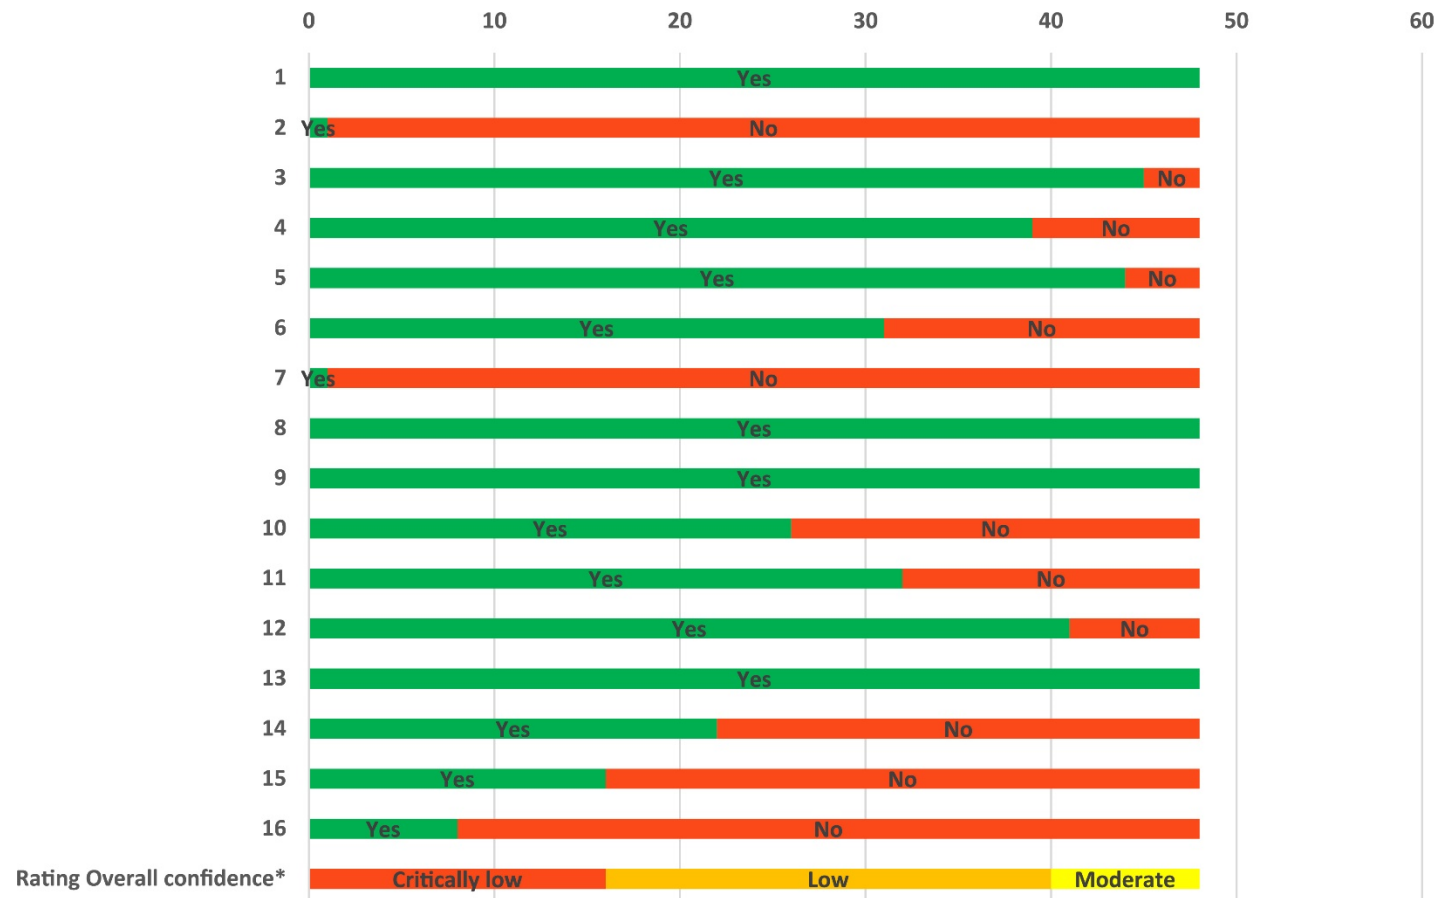

**Supplementary Figure 1.** Assessment of all included systematic reviews using AMSTAR 2.

1. Components of PICO; 2. Established prior to the conduct of the review; 3. Explain their selection of the study designs; 4. Comprehensive search;
5. Duplicate selection; 6. Duplicate extraction; 7. List of excluded studies and justify the exclusions; 8. Describe the included studies in adequate detail;
9. Use a satisfactory technique for assessing the risk of bias (RoB); 10. Report on the sources of funding; 11. Use appropriate methods for statistical combination of results;
12. Assess the potential impact of RoB in individual studies on the results; 13. Account for RoB in individual studies when interpreting/discussing the results of the review;
14. Provide a satisfactory explanation for, and discussion of, any heterogeneity observed in the results of the review; 15. Publication bias assessed; 16. Include conflict of interest
